# Supplementary material for: Confined supramolecular nanostructures of mesogen-bearing amphiphilesElectronic supplementary information (ESI) available: experimental details. See http://www.rsc.org/suppdata/cc/b2/b201444k/
Source: Royal Society of Chemistry journal article supplement (doi:10.1039/b201444k), 2002-04-05
Supplement: b201444k.doc [file b201444k.doc]

**Supporting data**

Experimental Section

The single-chain surfactant-bearing azobenzene **C12AzoC6N+** and bolaform amphiphile **BP-10** were prepared according to the published method.[6] The bolaform amphiphile **azo-11** was provided by Professor H. Ringsdorf and Dr. V. Hessel, Institute of Organic Chemistry, Johannes Gutenberg-Universität, Mainz, Germany.

The AFM images were acquired by commercial instruments Nanoscope III and IIIa AFM multimodeTM (Digital Instruments, CA). Silicon cantilevers (Park Scientific, CA) with spring constants of 0.06N/m were used for tapping-in-fluid (f=20-30 KHz), and silicon cantilevers (Digital Instrument, CA) for tapping in air (f=200-300 KHz).

To obtain molecular assemblies on mica, afreshly cleaved mica sheet was immersed into aqueous solution of the amphiphiles at appropriate concentrations. For ex-situ measurement, the mica sheet was taken out after adsorption for 30 min, and dried for approximate 1-2 hours in a dessicator (P2O5). Ex-situ AFM images of surfactant aggregates were obtained with tapping mode in air.

For in-situ measurement, solutions of the amphiphiles with appropriate concentrations were injected into the liquid cell, and it was allowed to equilibrate at least 1 h before imaging. In-situ AFM images of surfactant aggregates were obtained with tapping mode in fluid. Sometimes an external feedback circuit was used in order to obtain stable image and better resolution in liquid. [7]

(7) a) B. Anczykowski, J. P. Cleveland, D. Krueger, V. Elings and H. Fuchs, *Appl. Phys. A* **1998**, *66*, 885- 889. b) Chi, L. F. *Appl. Phys. A* **1999**, *68*, 203-210.
